# Supplementary material
Source: PubMed Central journal article supplement (PMC8657347)

Control

S1

lung

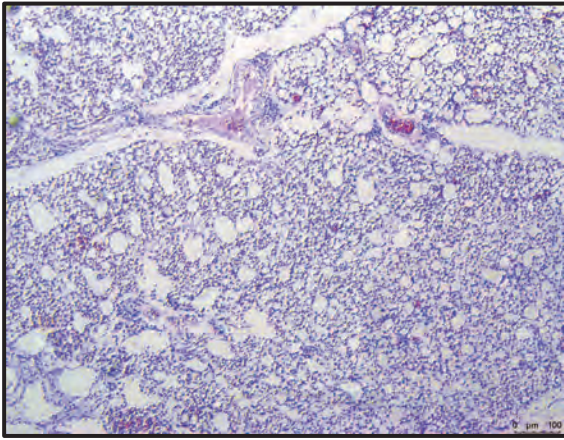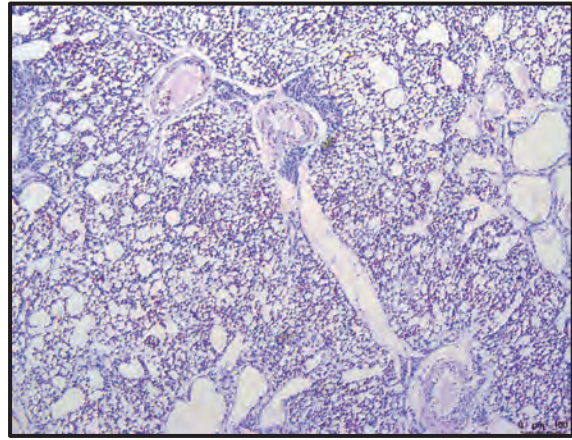

liver

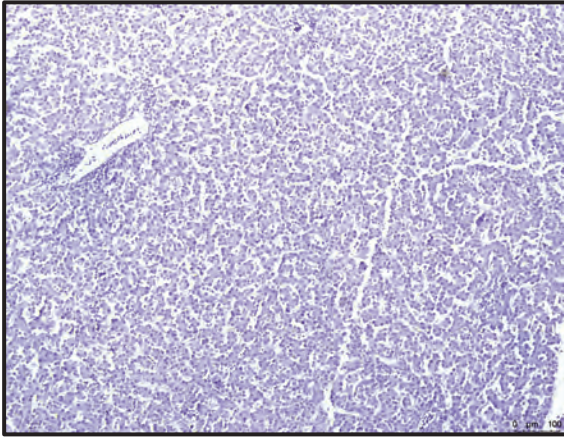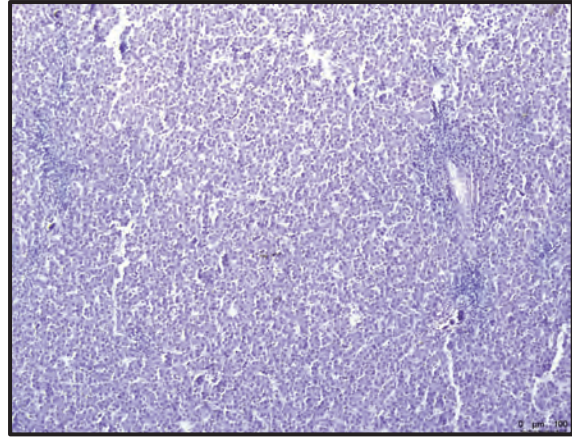

kidney

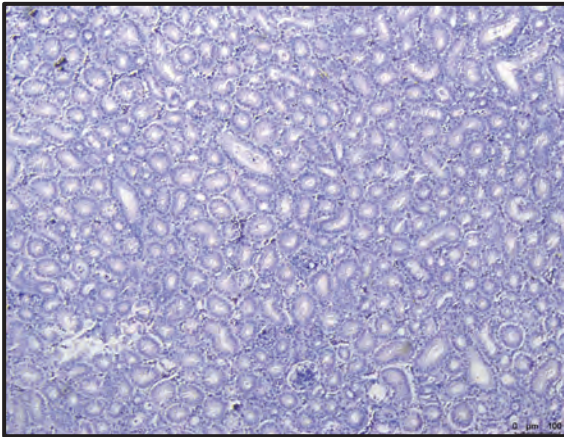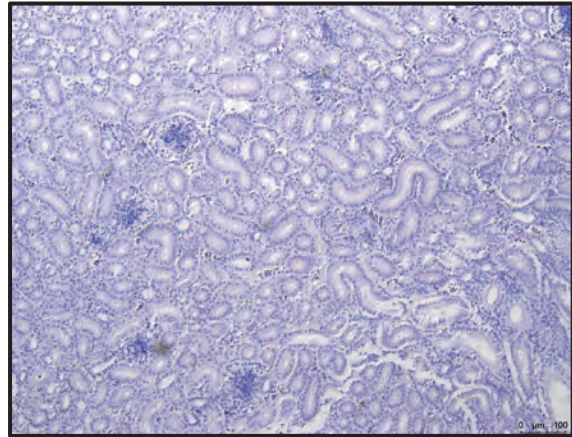

100 μm

Supplement: JAM-132-2421-s002.pdf [file JAM-132-2421-s002.pdf]
